# Supplementary material for: Assembly of carbon nanotubes into microparticles with tunable morphologies using droplets in a non-equilibrium state
Source: Royal Society of Chemistry journal article supplement (doi:10.1039/c7ra01846k), 2017-01-01
Supplement: c7ra01846k1.pdf [file c7ra01846k1.pdf]

## **Electronic Supplementary Information**

for

### **Assembly of carbon nanotubes into microparticles with tunable morphologies using droplets in a non-equilibrium state**

Sakurako Tomii, Masumi Yamada\*, Masahiro Mizuno, Yasuhiro Yamada, Takashi Kojima, Masahito Kushida, and Minoru Seki

Department of Applied Chemistry and Biotechnology, Graduate School of Engineering,  
Chiba University, 1-33 Yayoi-cho, Inage-ku, Chiba 263-8522, Japan.

\*m-yamada@faculty.chiba-u.jp

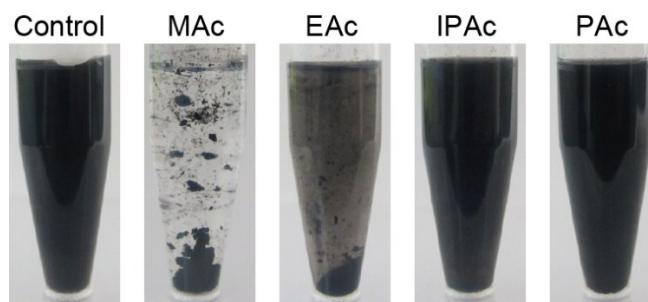

**Figure S1.** Aggregate formation of CNTs in water samples, equilibrated with a polar organic solvent (MAc, EAc, IPAc, or PAc). Aggregation behaviors of CNTs in DI water equilibrated with each solvent. The CNT concentration was 0.01%. MAc: methyl acetate; EAc: ethyl acetate; IPAc: isopropyl acetate; PAc: propyl acetate.

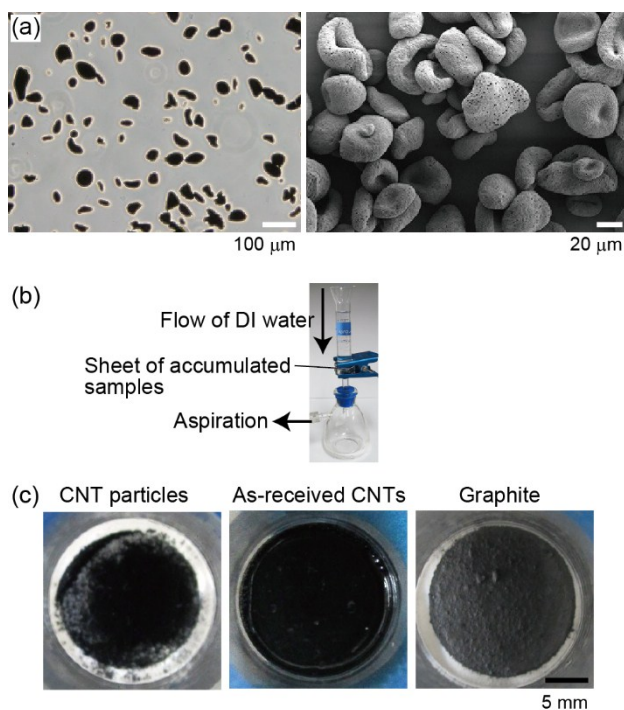

**Figure S2.** (a) Optical micrograph and SEM image of MWCNT particles prepared using IPAc as the continuous phase and employing the membrane emulsification technique. (b) Experimental setup. (c) Photographs of the sheets consisting of accumulated CNT particles, native CNTs (Buckypaper), and graphite on filter papers.
